# Supplementary material
Source: PubMed Central journal article supplement (PMC6207180)
Supplement: fj.201601282R.sd1.pdf [file fj.201601282R.sd1.pdf]

# Online Supplemental Information

**Adaptable interaction between aquaporin-1 and band 3 reveals a potential role of water channel in blood CO<sub>2</sub> transport (Hsu et al.; 2017)**

**(1) To estimate the concentration of water molecules inside a RBC and how much water is used for blood CO<sub>2</sub>/HCO<sub>3</sub><sup>-</sup> conversion:**

*<1-i> From the follows (1-3):*

The concentration of pure water is 55.6 M.

93% of plasma is H<sub>2</sub>O.

The average volume of a human RBC is ~86 fL (30% Hb, maximally 70% H<sub>2</sub>O).

Each adult body contains ~2 × 10<sup>13</sup> RBCs.

***We calculated:***

The concentration of water in plasma ([H<sub>2</sub>O]<sub>plasma</sub>) = 55.6 M × 93% = 52 M

**The concentration of water inside an RBC ([H<sub>2</sub>O]<sub>in</sub>)**

$$= \frac{86 \times 10^{-15} \text{ L}}{1 \text{ RBC}} \times (70\%) \times \frac{1000 \text{ g}}{1 \text{ L}} \times \frac{1 \text{ mol}}{18 \text{ g H}_2\text{O}} = \mathbf{17 \text{ M}}$$

**The number of water molecules inside an RBC:**

$$\frac{86 \times 10^{-15} \text{ L}}{1 \text{ RBC}} \times (70\%) \times \frac{1000 \text{ g}}{1 \text{ L}} \times \frac{1 \text{ mol}}{18 \text{ g H}_2\text{O}} \times \frac{6 \times 10^{23}}{1 \text{ mol}} = \mathbf{2 \times 10^{12} \text{ water molecules/RBC}}$$

*<1-ii> Know that* 13 moles of CO<sub>2</sub> are produced by a healthy adult per day, which is equivalent to 9 mmols of CO<sub>2</sub> produced per minute.

As maximally 90% CO<sub>2</sub> conversion is carried out by CAII inside RBCs, and 1 H<sub>2</sub>O molecule is required for 1 CO<sub>2</sub> conversion, ~8 mmols of H<sub>2</sub>O are required for CO<sub>2</sub> conversion per minute per adult.

**In each RBC, the number of H<sub>2</sub>O molecules required for CO<sub>2</sub> conversion per minute:**

$$\frac{(8 \text{ mmol H}_2\text{O/minute} * \text{adult}) (6 \times 10^{23} \text{ molecules/mol})}{2 \times 10^{13} \text{ RBCs/adult}} = \frac{\mathbf{2.4 \times 10^8 \text{ H}_2\text{O molecules}}}{\mathbf{1 \text{ RBC} * \text{minute}}}$$

**(2) To compare the reaction rates of intracellular CO<sub>2</sub> conversion in systemic arteries versus in capillaries:**

Consider the reaction taken place inside RBCs in systemic circulation:

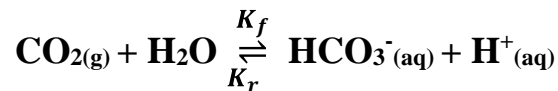

**Forward reaction rate ( $R_f$ )** =  $K_f [\text{CO}_2]_{\text{in}} [\text{H}_2\text{O}]_{\text{in}}$ , where  $K_f$  is the forward reaction coefficient.

Reverse reaction rate ( $R_r$ ) =  $K_r [\text{CO}_2]_{\text{in}} [\text{H}_2\text{O}]_{\text{in}}$ , where  $K_r$  is the reverse reaction coefficient.

$[\text{CO}_2]_{\text{in}}$  or  $[\text{CO}_2]_{\text{out}}$  refers to  $[\text{CO}_2]$  inside or outside an RBC.

The reaction coefficient ( $K$ ) primarily accounts for the extremely rapid enzymatic activity of CAII. Below we assessed whether AQP1-band 3 coupling could affect the reaction rate, or whether this coupling contributes to  $K_f$ .

In the calculation below, we only consider the forward reaction, which takes place when RBC circulate from systemic arteries to capillaries.

**<2-i> Know that (1-3):**

PCO<sub>2</sub> in artery at 37°C ~40 mmHg

PCO<sub>2</sub> in systemic capillaries at 37°C ~46 mmHg

For each mmHg of PCO<sub>2</sub> at 37°C, there are 0.03 mmols of CO<sub>2</sub> dissolved per liter of plasma.

Thus,

$$\text{PCO}_{2(\text{artery})} \text{ at } 37^\circ\text{C} \sim 40 \text{ mmHg} \times \frac{0.03 \text{ mM CO}_2 \text{ dissolved in plasma}}{\text{mmHg}} = 1.2 \text{ mM CO}_2$$

$$\text{PCO}_{2(\text{systemic capillaries})} \text{ at } 37^\circ\text{C} \sim 46 \text{ mmHg} \times \frac{0.03 \text{ mM CO}_2 \text{ dissolved in plasma}}{\text{mmHg}} = 1.38 \text{ mM CO}_2$$

**<2-ii>** Know that the capillary transit time for erythrocytes is 1 – 3.5 sec, and the half-life ( $T_{1/2}$ ) for inward CO<sub>2</sub> diffusion (or CO<sub>2</sub> uptake by RBCs) is 45 – 65 msec (4, 5). As diffusion is driven by concentration gradients across the cell membrane, the rapid  $T_{1/2}$  for CO<sub>2</sub> diffusion into RBCs allows

[CO<sub>2</sub>] to reach an equilibrium before RBCs leave systemic capillaries. *Thus, for simplicity of the calculation, we assume that [CO<sub>2</sub>]<sub>in</sub> = [CO<sub>2</sub>]<sub>out</sub>, and that CO<sub>2</sub> enters or leaves RBCs only by diffusion.*

[CO<sub>2</sub>]<sub>out</sub> = 1.38 mM (inside a systemic capillary) or 1.2 mM (inside an artery)

*When RBCs are in systemic capillaries:*

$$R_{f(\text{capillary})} = K_{f(\text{capillary})} [\text{CO}_2]_{\text{out}} [\text{H}_2\text{O}]_{\text{in}} = K_{f(\text{capillary})} (1.38 \text{ mM}) (17 \text{ M})$$

*When RBCs are in an artery:*

$$R_{f(\text{artery})} = K_{f(\text{artery})} [\text{CO}_2]_{\text{out}} [\text{H}_2\text{O}]_{\text{in}} = K_{f(\text{artery})} (1.2 \text{ mM}) (17 \text{ M})$$

*As RBCs enter from systemic arteries to capillaries, the change of the reaction rate for intracellular CO<sub>2</sub> conversion is:*

$$\frac{R_{f(\text{capillary})}}{R_{f(\text{artery})}} = \frac{K_{f(\text{capillary})} (1.38 \text{ mM}) (< 17 \text{ M})}{K_{f(\text{artery})} (1.2 \text{ mM})(17 \text{ M})} \approx \mathbf{\max 1.15} \frac{K_{f(\text{capillary})}}{K_{f(\text{artery})}}$$

That is, if  $K_f$  does not account for osmotically-driven AQP1-band 3 coupling, then  $\frac{K_{f(\text{capillary})}}{K_{f(\text{artery})}} = 1$ , and the reaction rate would increase maximally 15% when RBCs enter the systemic capillary bed.

**If AQP1 and band 3 are structurally and functionally coupled in systemic capillaries but less coupled or uncoupled in arteries, this shall result in larger  $K_{f(\text{capillary})}$  than  $K_{f(\text{artery})}$ . Thus,**

$$\frac{R_{f(\text{capillary})}}{R_{f(\text{artery})}} > \mathbf{1.15}$$

That is, the reaction rate will increase more than 15% when RBCs enter the systemic capillary bed.

**(3) To further consider restricted erythrocyte sizes in systemic capillaries:**

If  $[H_2O]_{in}$  decreases ~10% (e.g.  $17M \rightarrow 15M$ ) when RBCs squeeze through systemic capillaries,

If AQP1-band 3 coupling does not involve in the reaction ( $\frac{K_{f(capillary)}}{K_{f(artery)}} = 1$ ),

$$\frac{R_{f(capillary)}}{R_{f(artery)}} \sim 1 \times \frac{(1.38 \text{ mM})(15 \text{ M})}{(1.2 \text{ mM})(17 \text{ M})} = 1.015$$

So there is no change in the reaction rates of CO<sub>2</sub> conversion before or after red cells entering systemic capillaries.

Also, noticeably in the above example, a 10% drop in  $[H_2O]_{in}$  results in 14% rate reduction for CO<sub>2</sub> conversion when RBCs circulate in capillaries. Further decrease in  $[H_2O]_{in}$  would make  $R_{f(capillary)}$  smaller than  $R_{f(artery)}$ . On the other hand, if transient AQP1-band 3 coupling supports

intraerythrocytic CO<sub>2</sub> conversion,  $\frac{K_{f(capillary)}}{K_{f(artery)}} > 1$ , which could compensate the negative effect of erythrocyte volume restriction (or  $[H_2O]_{in}$  reduction) on the forward reaction rate.

**REFERENCE:**

1. Beachey, W. (2013) *Respiratory care anatomy and physiology : foundations for clinical practice*, Elsevier, St. Louis, Mo.
2. Rhoades, R., and Bell, D. R. (2009) *Medical physiology : principles for clinical medicine*, Lippincott Williams & Wilkins, Philadelphia
3. Kuchel, P. W., and Benga, G. (2005) Why does the mammalian red blood cell have aquaporins? *Biosystems* **82**, 189-196
4. Niizeki, K., Mochizuki, M., and Uchida, K. (1983) Rate of CO<sub>2</sub> diffusion in the human red blood cell measured with pH-sensitive fluorescence. *The Japanese journal of physiology* **33**, 635-650
5. Geers, C., and Gros, G. (2000) Carbon dioxide transport and carbonic anhydrase in blood and muscle. *Physiological reviews* **80**, 681-715
